# Supplementary material for: HEAT TRANSFER TO SODIUM AT SMALL VALUES OF REYNOLDS NUMBER
Source: Springer Nature journal article supplement (doi:10.1038/nsmb1089), 1960-04-01
Supplement: nsmb1089-S1.pdf [file nsmb1089-S1.pdf]

## Supplementary Information

*Mycobacterium tuberculosis* Dihydrofolate Reductase is a Target for Isoniazid

Argyrides Argyrou, Matthew W. Vetting, Bola Aladegbami & John S. Blanchard

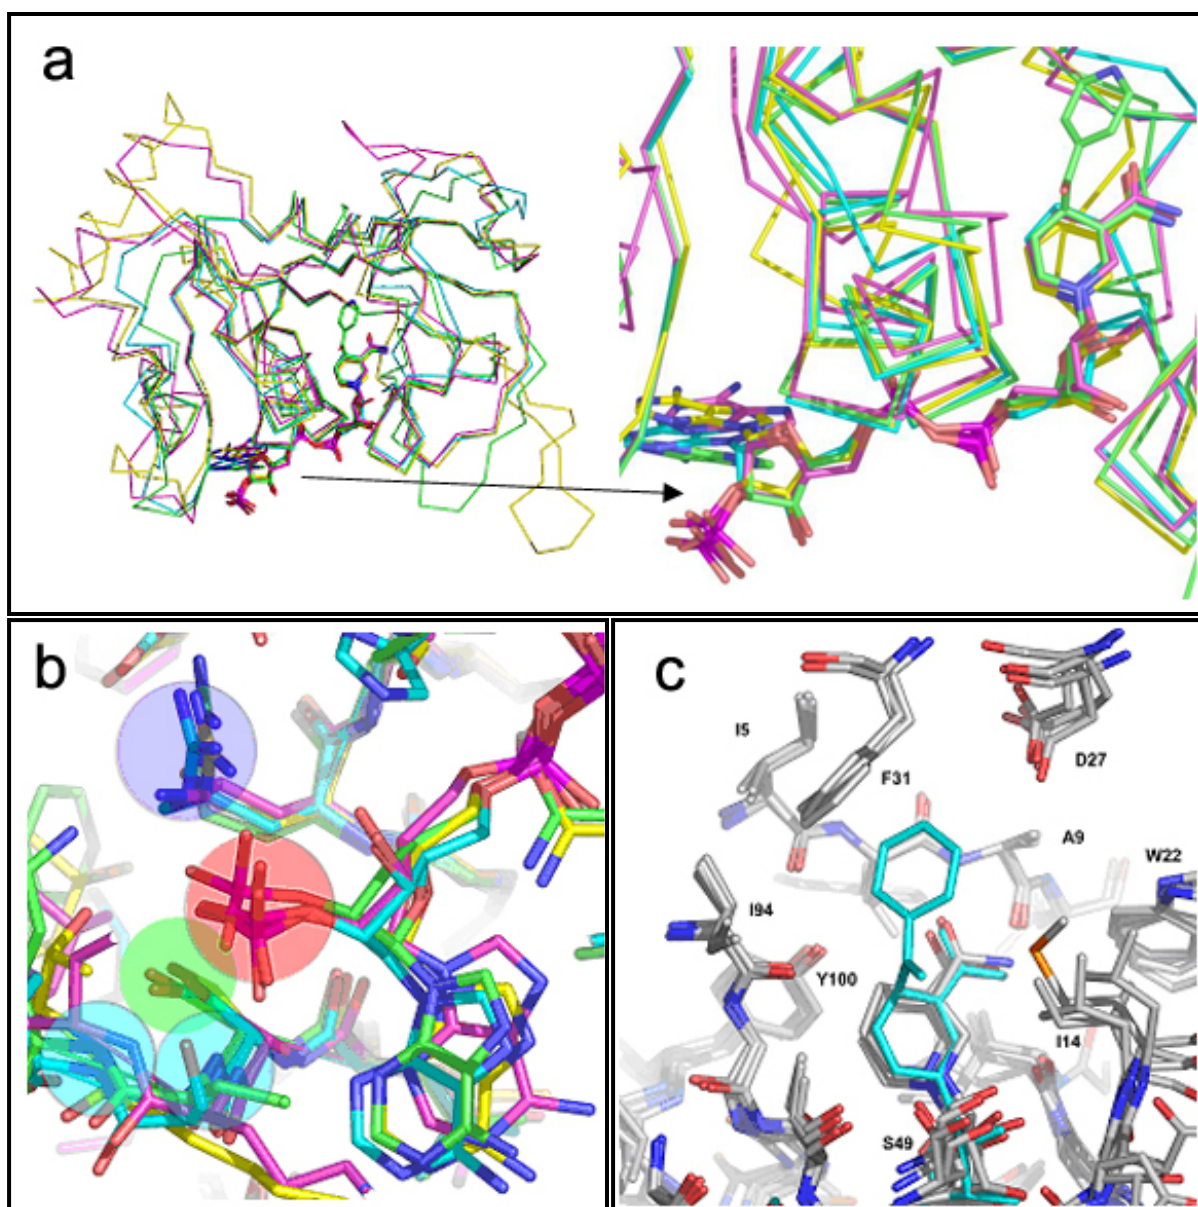

**Supplementary Figure 1** Comparison of crystal structures of DHFRs from three organisms determined at  $7.2 \leq \text{pH} \leq 8.0$  with the *Mtb*-DHFR structure determined at pH 4.6. **a**, The overall structure (left) and conformation of the bound NADPH (right) of *Mtb*-DHFR (green, this work), *Escherichia coli* DHFR (cyan, 1RX1), *Plasmodium vivax* DHFR (yellow, 2BL9), and human DHFR (maroon, 1PD8) are similar. **b**, The 2'-phosphate (red circle) of NADPH/NADP<sup>+</sup>

interacts with a conserved serine residue (green circle), conserved basic residue (arginine or lysine, blue circle), and two consecutive amide backbone atoms from a conserved loop (cyan circles). **c**, Residues that comprise the binding pocket for the isonicotinoyl moiety of INH-NADP (cyan), which is part of the dihydrofolate binding site, are conserved.

| Organism                          | PDB ID | Crystallization conditions                                             | Reference    |
|-----------------------------------|--------|------------------------------------------------------------------------|--------------|
| <i>Mycobacterium tuberculosis</i> | 1DG8   | 100 mM sodium acetate pH 4.6<br>1.6 M ammonium sulfate<br>10% glycerol | 1, this work |
| <i>Plasmodium vivax</i>           | 2BL9   | 100 mM tris pH 7.2<br>30% PEG-4000<br>10% glycerol                     | 2            |
| Human                             | 1PD8   | 100 mM potassium phosphate pH 8.0<br>61-63% ammonium sulfate           | 3            |
| <i>Escherichia coli</i>           | 1RX1   | 100 mM imidazole pH 8.0<br>300 mM CaCl <sub>2</sub><br>15% PEG-6000    | 4            |

### References:

1. Li, R. et al. Three-dimensional structure of *Mycobacterium tuberculosis* dihydrofolate reductase reveals opportunities for the design of novel tuberculosis drugs. *J. Mol. Biol.* **295**, 307-323 (2000).
2. Kongsaree, P. et al. Crystal structure of dihydrofolate reductase from *Plasmodium vivax*: pyrimethamine displacement linked with mutation-induced resistance. *Proc. Natl. Acad. Sci. U. S. A.* **102**, 13046-13051 (2005).
3. Cody, V., Luft, J. R., Pangborn, W. & Gangjee, A. Analysis of three crystal structure determinations of a 5-methyl-6-N-methylanilino pyridopyrimidine antifolate complex with human dihydrofolate reductase. *Acta Crystallogr.* **D59**, 1603-1609 (2003).
4. Sawaya, M. R. & Kraut, J. Loop and subdomain movements in the mechanism of *Escherichia coli* dihydrofolate reductase: crystallographic evidence. *Biochemistry* **36**, 586-603 (1997).
